# Supplementary material
Source: PubMed Central journal article supplement (PMC5385283)

Figure E2

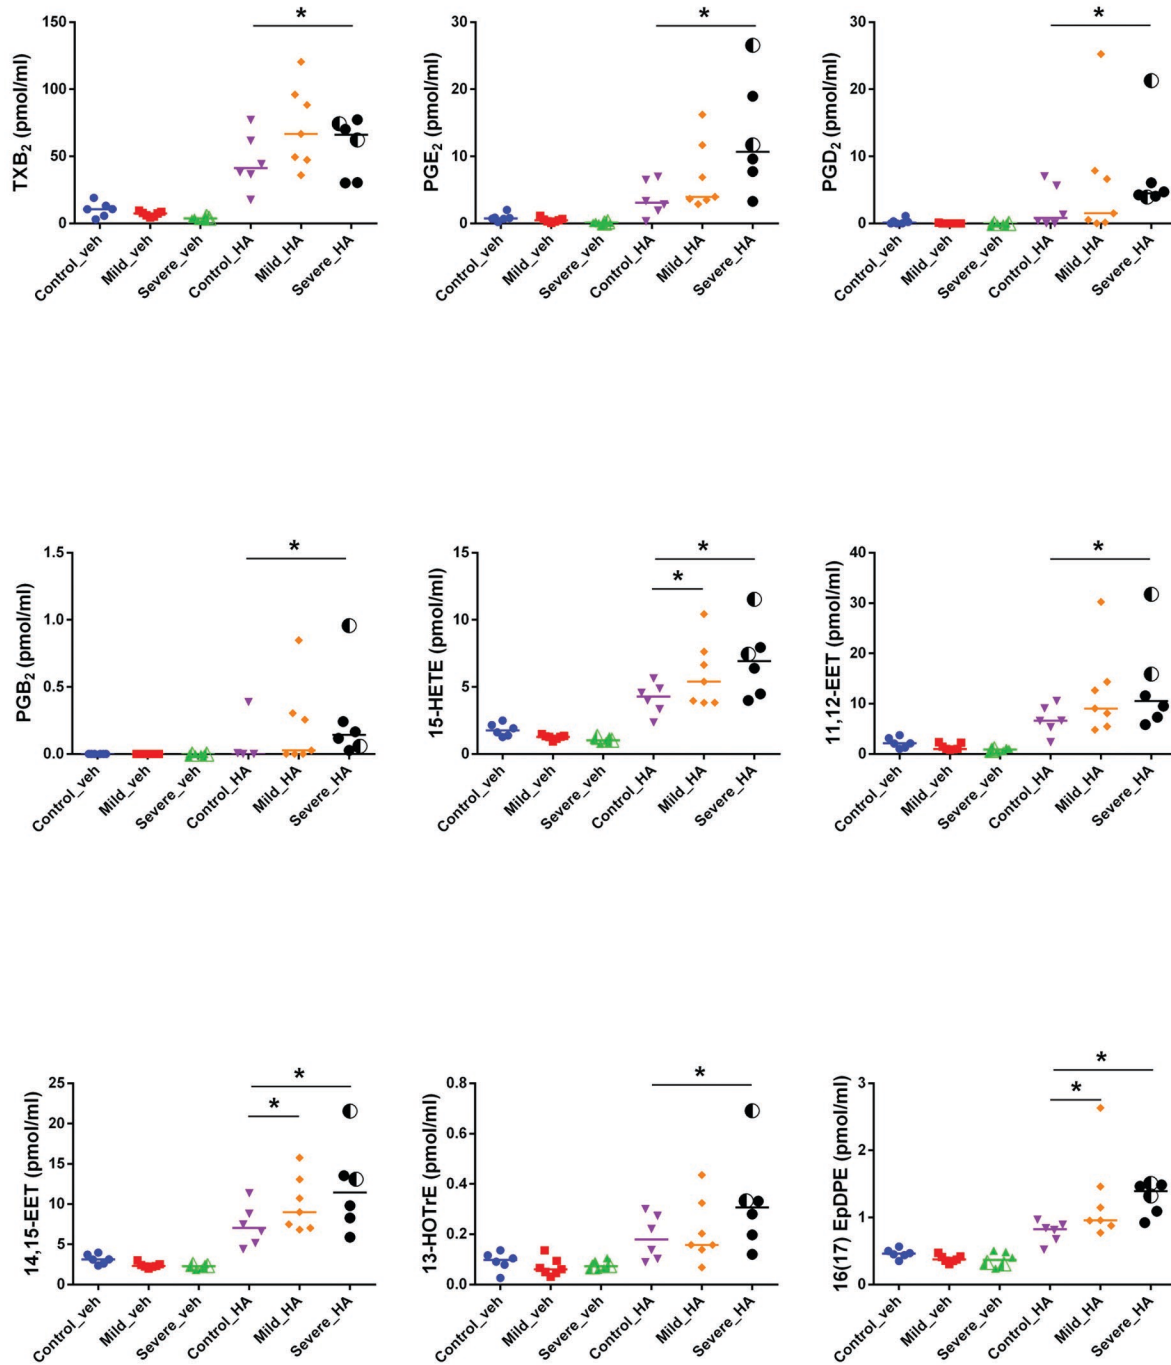

Supplement: NIHMS828254-supplement-2.pdf [file NIHMS828254-supplement-2.pdf]

**Figure E3**

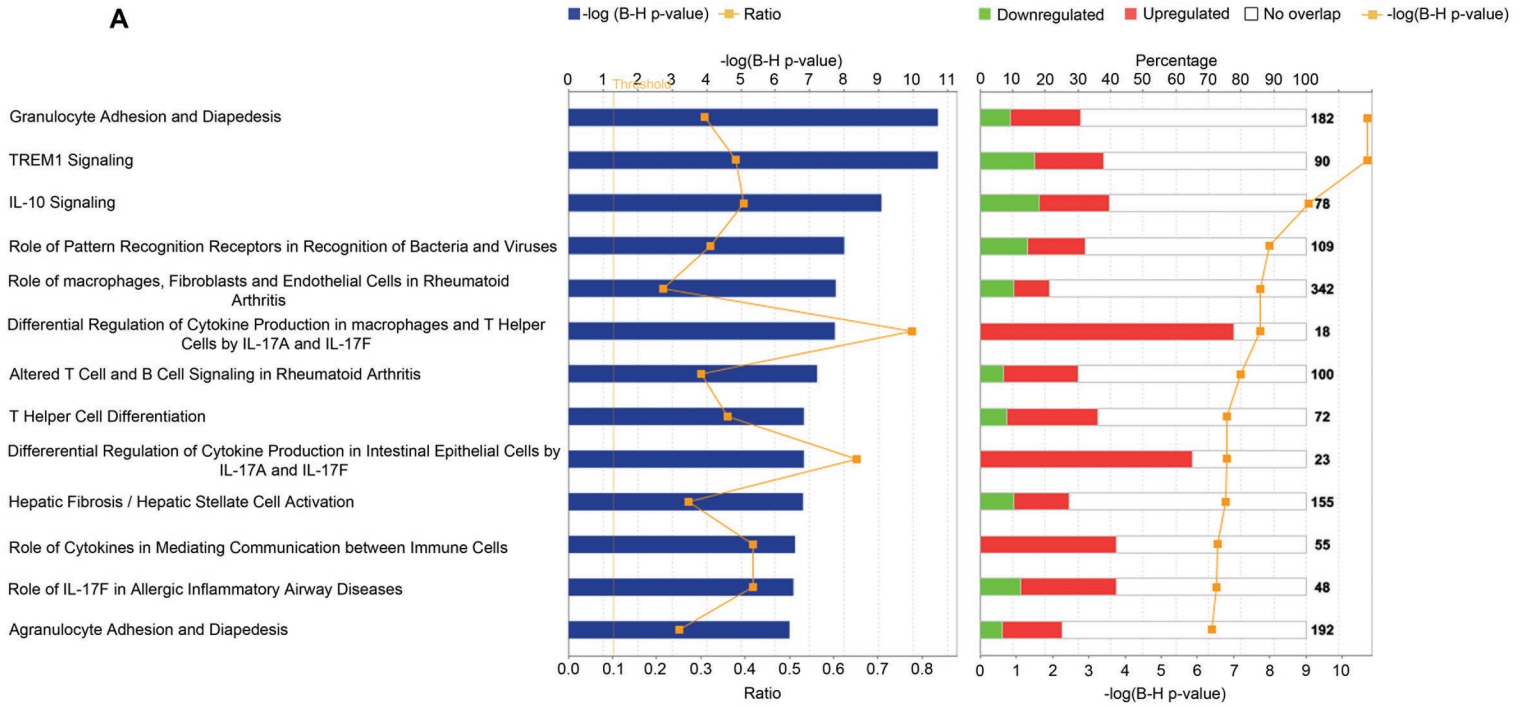

**B**

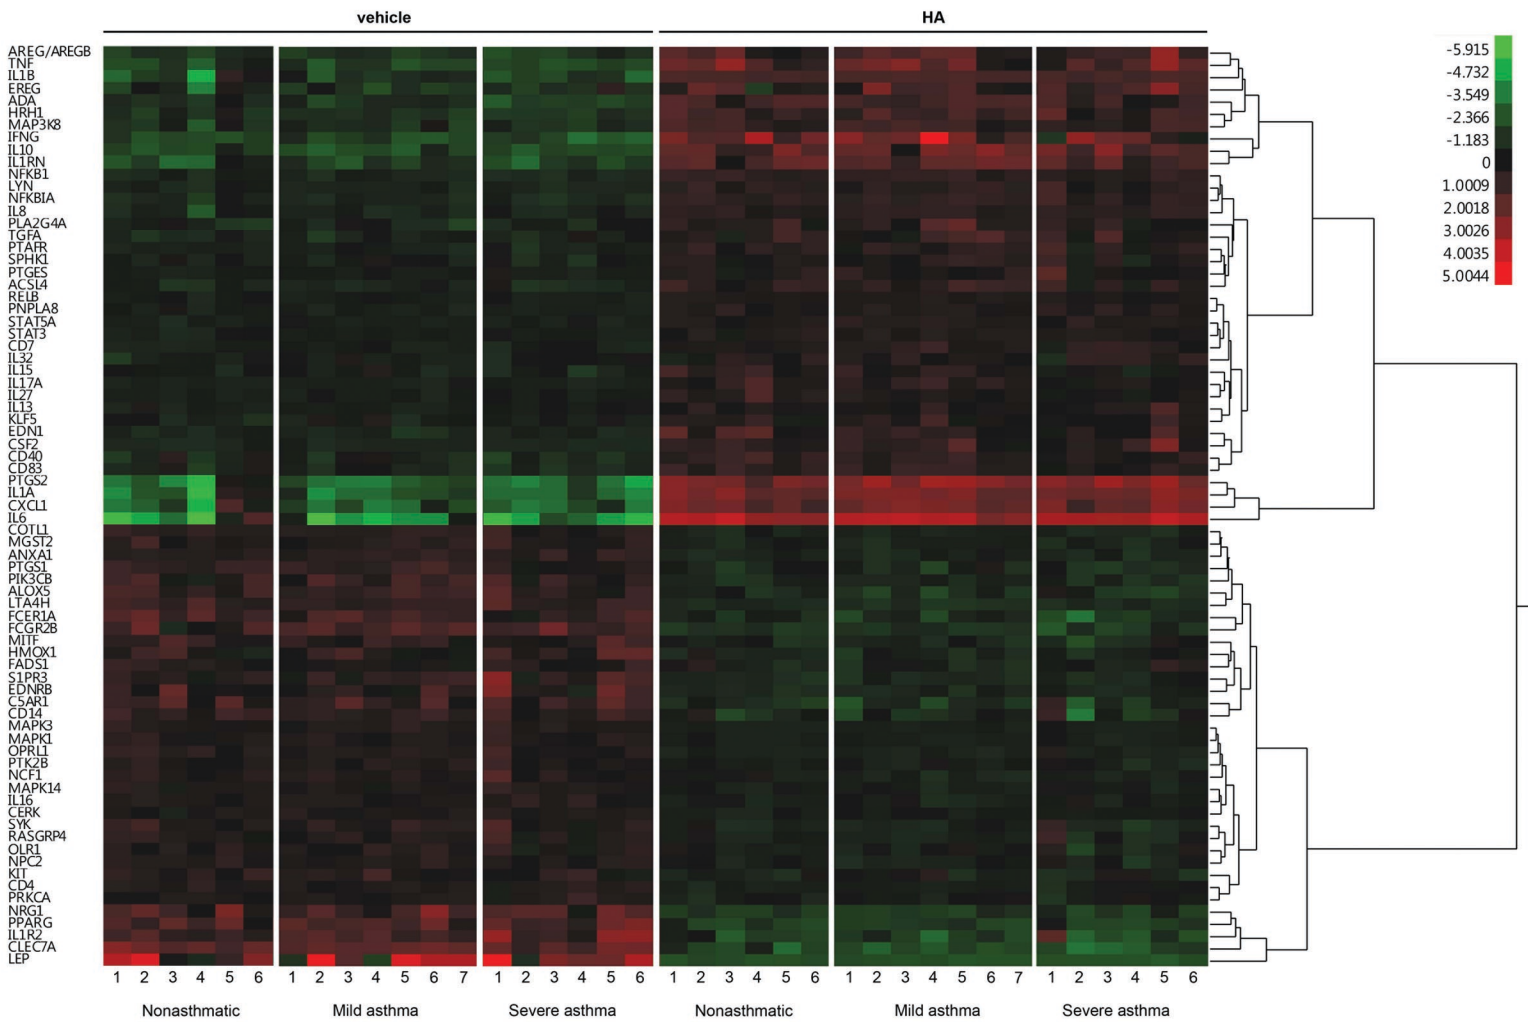

Supplement: NIHMS828254-supplement-3.pdf [file NIHMS828254-supplement-3.pdf]

Figure E4

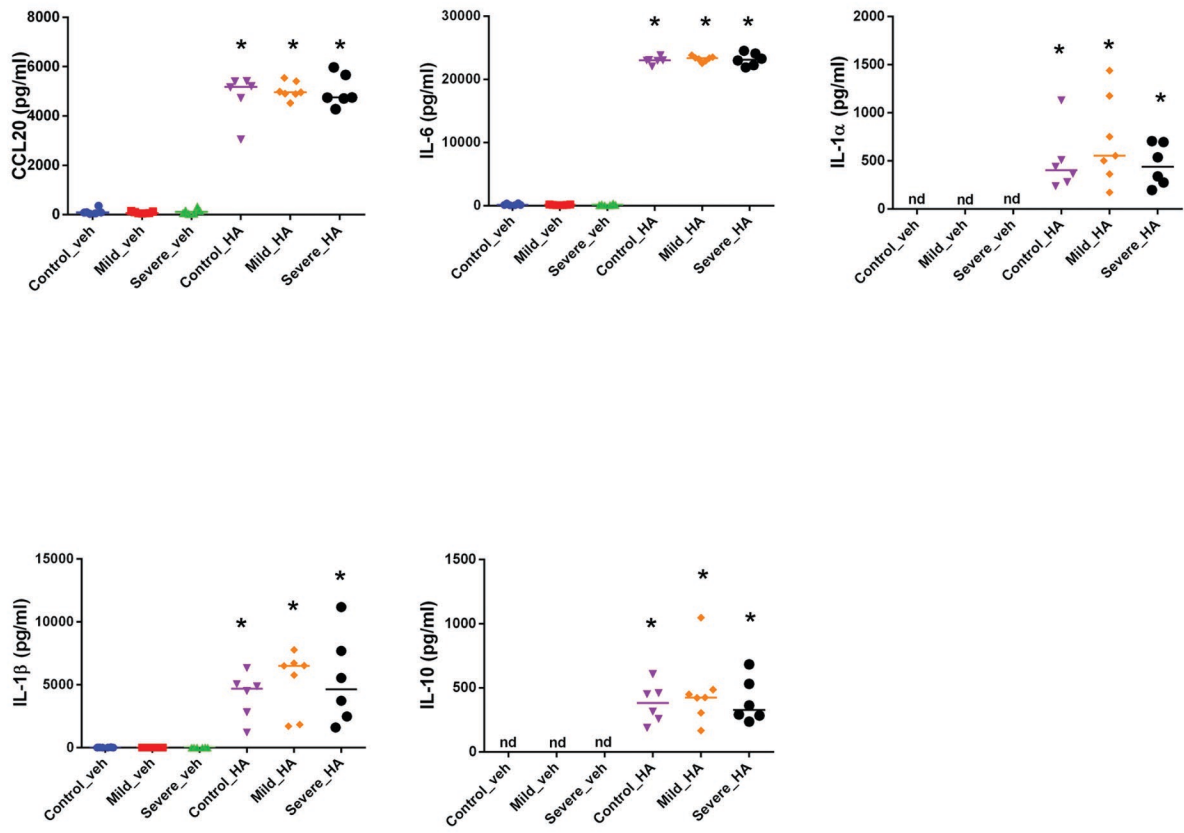

Supplement: NIHMS828254-supplement-4.pdf [file NIHMS828254-supplement-4.pdf]

Figure E5

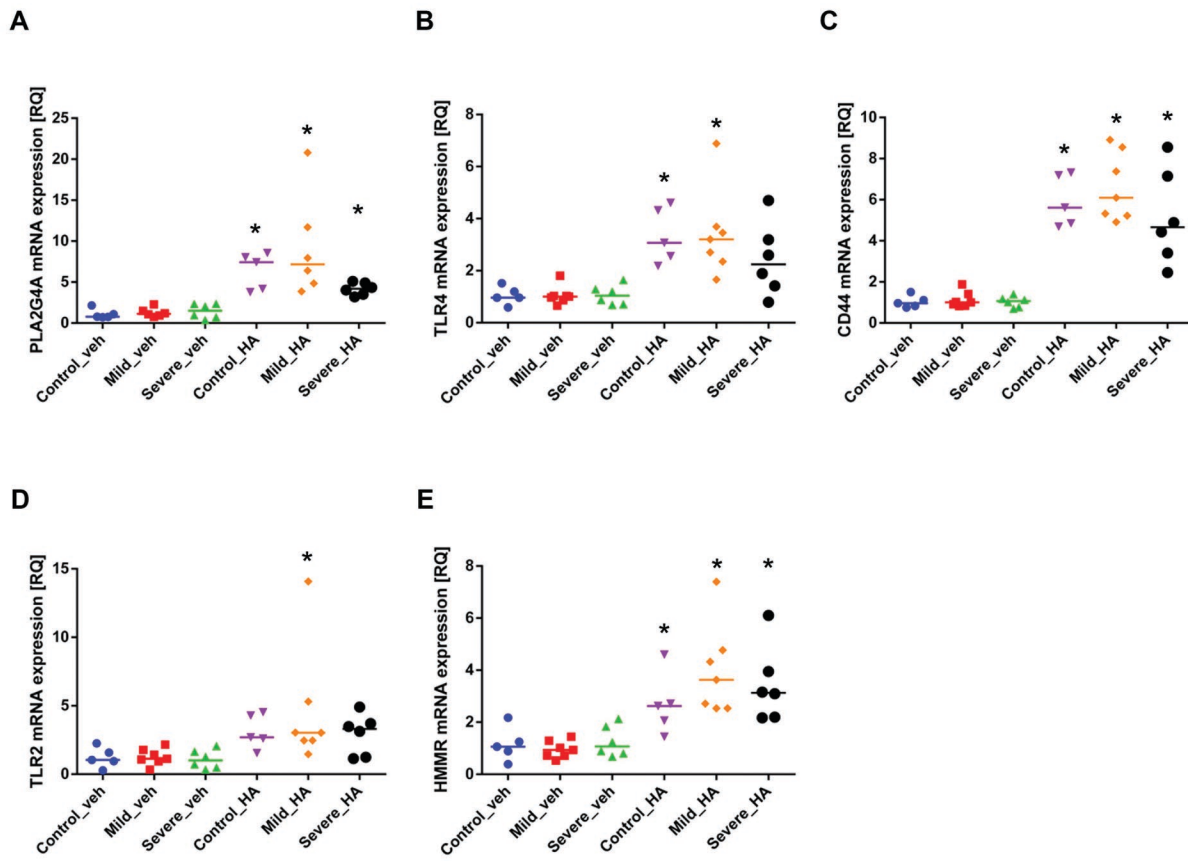

Supplement: NIHMS828254-supplement-5.pdf [file NIHMS828254-supplement-5.pdf]
